# Supplementary material for: High-Output Lotus-Leaf-Bionic Triboelectric Nanogenerators Based on 2D MXene for Health Monitoring of Human Feet
Source: Nanomaterials (Basel). 2022 Sep 16;12(18):3217. doi: 10.3390/nano12183217 (PMC9500758; doi:10.3390/nano12183217)
Supplement: Supplementary file 1 [file nanomaterials-12-03217-s001.zip]

Archive with 5 entries (5 files):
- nanomaterials-1822422 - Supplementary Materials.pdf
- Video S1 Driving LED arrays.mp4
- Video S2-1 Driving electronic watch.mp4
- Video S2-2 Driving electronic watch.mp4
- Video S3 Feet sensor test.mp4
